# Supplementary material for: Synthesis of LiV3O8 nanosheets as a high-rate cathode material for rechargeable lithium batteries
Source: Royal Society of Chemistry journal article supplement (doi:10.1039/c2ce06326c), 2012-01-01
Supplement: c2ce06326c.pdf [file c2ce06326c.pdf]

# Supporting information

## Synthesis of $\text{LiV}_3\text{O}_8$ nanosheets as a high-rate cathode material for rechargeable lithium batteries

Haiyan Wang<sup>a\*</sup>, Yu Ren<sup>b</sup>, Yuan Wang<sup>b</sup>, Wenjie Wang<sup>a</sup>, Suqin Liu<sup>a\*</sup>

<sup>a</sup>*School of Chemistry and Chemical Engineering, Central South University, Changsha, 410083, P.R. China*

<sup>b</sup>*School of Chemistry, University of St Andrews, Fife KY16 9ST, U.K*

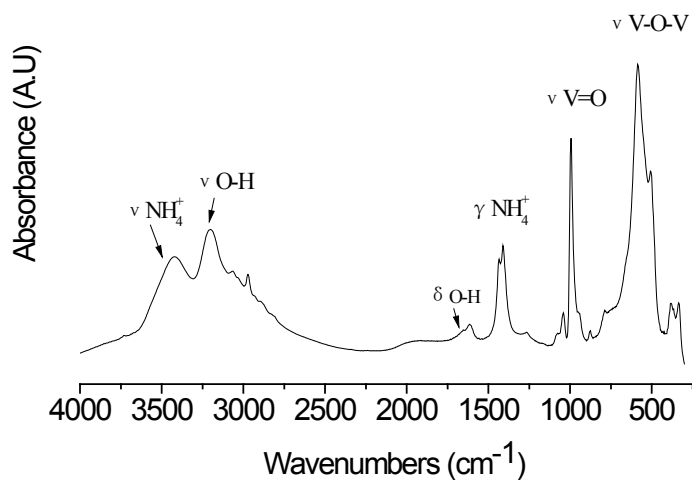

Fig. S1 FT-IR of the as-prepared  $(\text{NH}_4)_{0.5}\text{V}_2\text{O}_5$

\* Corresponding author. Tel.&fax: +86-731-88879850.  
E-mail address: wanghy419@126.com (H.Wang).

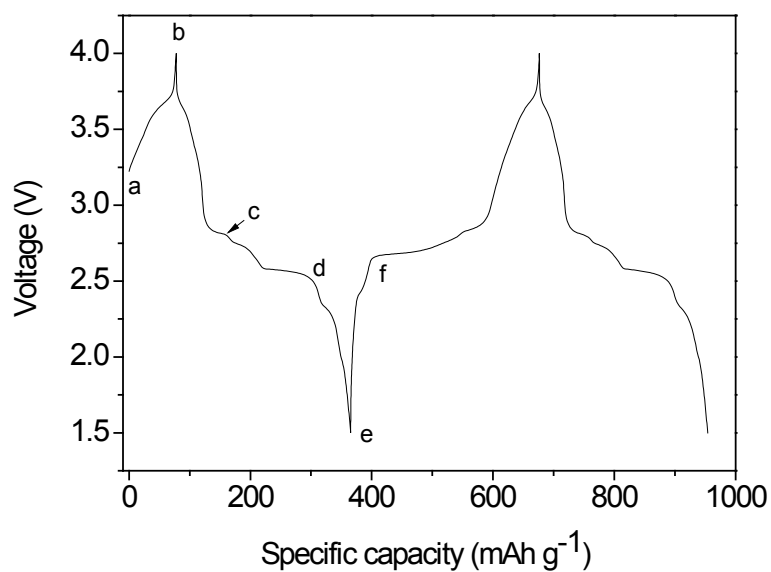

Fig. S2 The first two charge-discharge curves of  $\text{LiV}_3\text{O}_8$  electrode between 1.8 and 4.0 V; The inset symbols of a-e depict different charge status: (a) no cycling; (b) charge to 4.0 V; (c) discharge to 2.8 V at the 1st cycle; (d) discharge to 2.5 V at the 1st cycle; (e) discharge to 1.5 V at the 1st cycle; (f) charge to 2.5 V at the 2nd cycle.
